# Supplementary material
Source: PubMed Central journal article supplement (PMC6223653)

## Acute hepatologic and nephrologic effects of calcitriol in Syrian golden hamster (*Mesocricetus auratus*)\*

Ewa Podgorska<sup>1</sup>, Martyna Sniegocka<sup>1</sup>, Marianna Mycinska<sup>2</sup>, Wojciech Trybus<sup>2</sup>, Ewa Trybus<sup>2</sup>, Anna Kopacz-Bednarska<sup>2</sup>, Olga Wiechec<sup>1</sup>, Martyna Krzykawska-Serda<sup>1</sup>✉, Martyna Elas<sup>1</sup>, Teodora Krol<sup>2</sup>, Krystyna Urbanska<sup>1</sup> and Andrzej Slominski<sup>3, 4</sup>

<sup>1</sup>Department of Biophysics, Faculty of Biochemistry, Biophysics and Biotechnology, Jagiellonian University in Krakow, Kraków, Poland; <sup>2</sup>Department of Cell Biology and Electron Microscopy, Institute of Biology, The Jan Kochanowski University, Kielce, Poland; <sup>3</sup>Department of Dermatology, Comprehensive Cancer Center, Cancer Chemoprevention Program, University of Alabama at Birmingham, Birmingham, AL, USA; <sup>4</sup>VA Medical Center, Birmingham, AL, USA

Although vitamin D is included in the group of fat-soluble vitamins, it must be considered as a prohormone. Its active forms, including calcitriol, have pleiotropic effects and play an important role in the regulation of cell proliferation, differentiation and apoptosis, as well as in hormone secretion, and they demonstrate anti-cancer properties. Since calcitriol delivery can be beneficial for the organism, and Syrian golden hamsters represent a unique experimental model, we decided to investigate its toxicity in this species. In this study, we injected calcitriol intraperitoneally at doses 0 (control),  $0.180 \pm 0.009$   $\mu\text{g}/\text{kg}$  and  $0.717 \pm 0.032$   $\mu\text{g}/\text{kg}$ . Animal behavior was observed for 72 hrs after injection, and afterwards blood, liver and kidneys were collected for post-mortem examination, electron microscopy, and hematology analyses. The highest dose of calcitriol induced a change in animal behavior from calm to aggressive, and the liver surface showed morphological signs of damage. Following injection of calcitriol, ultrastructural changes were also observed in the liver and kidneys, e.g. vacuolization and increased number of mitochondria. There was also a trend for increased serum levels of aspartate aminotransferase (AST), but not of alanine aminotransferase (ALT) or GGTP

(gamma-glutamyl transpeptidase). There was no change in Ca, Mg and P levels, as well as in blood morphology between experimental and control groups. These results indicate that calcitriol at 0.717, but not at 0.180  $\mu\text{g}/\text{kg}$ , may induce acute damage to the liver and kidneys, without inducing calcemia. We propose that the hepatotoxic effect of calcitriol in hamster constitutes the primary cause of behavioral changes.

**Key words:** calcitriol, Syrian golden hamster, hepatologic toxicity, nephrologic toxicity

**Received:** 07 April, 2018; **revised:** 21 May, 2018; **accepted:** 06 June, 2018; **available on-line:** ?? August, 2018

✉ e-mail: [martyna.krzykawska@uj.edu.pl](mailto:martyna.krzykawska@uj.edu.pl)

\*Preliminary data was reported previously at the XLV Winter School of Faculty of Biochemistry, Biophysics and Biotechnology of Jagiellonian University 9–14 February 2018, Zakopane, Poland.

**Abbreviations:** ALT, alanine aminotransferase; AST, aspartate aminotransferase; ES, Endocrine Society; GGTP, gamma-glutamyl transpeptidase; UVB, ultraviolet B; VDBP, Vitamin D Binding Protein; VDT, Vitamin D Toxicity

## Figure S1

Detailed composition of the Labofeed B standard (Wytwórnia Pasz "Morawski", Poland).

[ <https://www.sukces.info.pl/labofeed-b> ]

|                    |    |       |                       |    |      |
|--------------------|----|-------|-----------------------|----|------|
| Raw protein        | g  | 175   | Vitamin B1            | mg | 8    |
| Crude fat          | g  | 35    | Vitamin B2            | mg | 7    |
| Crude fiber        | g  | 70    | Vitamin B6            | mg | 11   |
| Starch             | g  | 330   | Vitamin B12           | µg | 42   |
| Ash                | g  | 32    | Pantothenic acid      | mg | 25   |
| Calcium            | g  | 9.5   | Folic acid            | mg | 2    |
| General phosphorus | g  | 6.5   | Biotin                | mg | 0.3  |
| Magnesium          | g  | 3     | Nicotinic acid        | mg | 94   |
| Potassium          | g  | 7.5   | Choline               | mg | 1900 |
| Sodium             | g  | 1.9   | Lysine                | g  | 9    |
| Sulfur             | g  | 1.9   | Methionine + Cysteine | g  | 6.3  |
| Iron               | mg | 144   | Tryptophan            | g  | 2    |
| Manganese          | mg | 50    | Threonine             | g  | 6    |
| Zinc               | mg | 50    | Isoleucine            | g  | 6    |
| Copper             | mg | 11    | Leucine               | g  | 12   |
| Iodine             | mg | 0.2   | Valine                | g  | 8    |
| Selenium           | mg | 0.4   | Histidine             | g  | 4    |
| Vitamin A          | IU | 12000 | Arginine              | g  | 10   |
| Vitamin D3         | IU | 800   | Phenylalanine         | g  | 7    |
| Vitamin E          | mg | 78    | Tyrosine              | g  | 5.5  |
| Vitamin K3         | mg | 2.4   | Betaine               |    | 17   |

**Figure S2**

Liver mass of the hamsters treated with calcitriol for 72 hours. The data labels indicate the animal code.

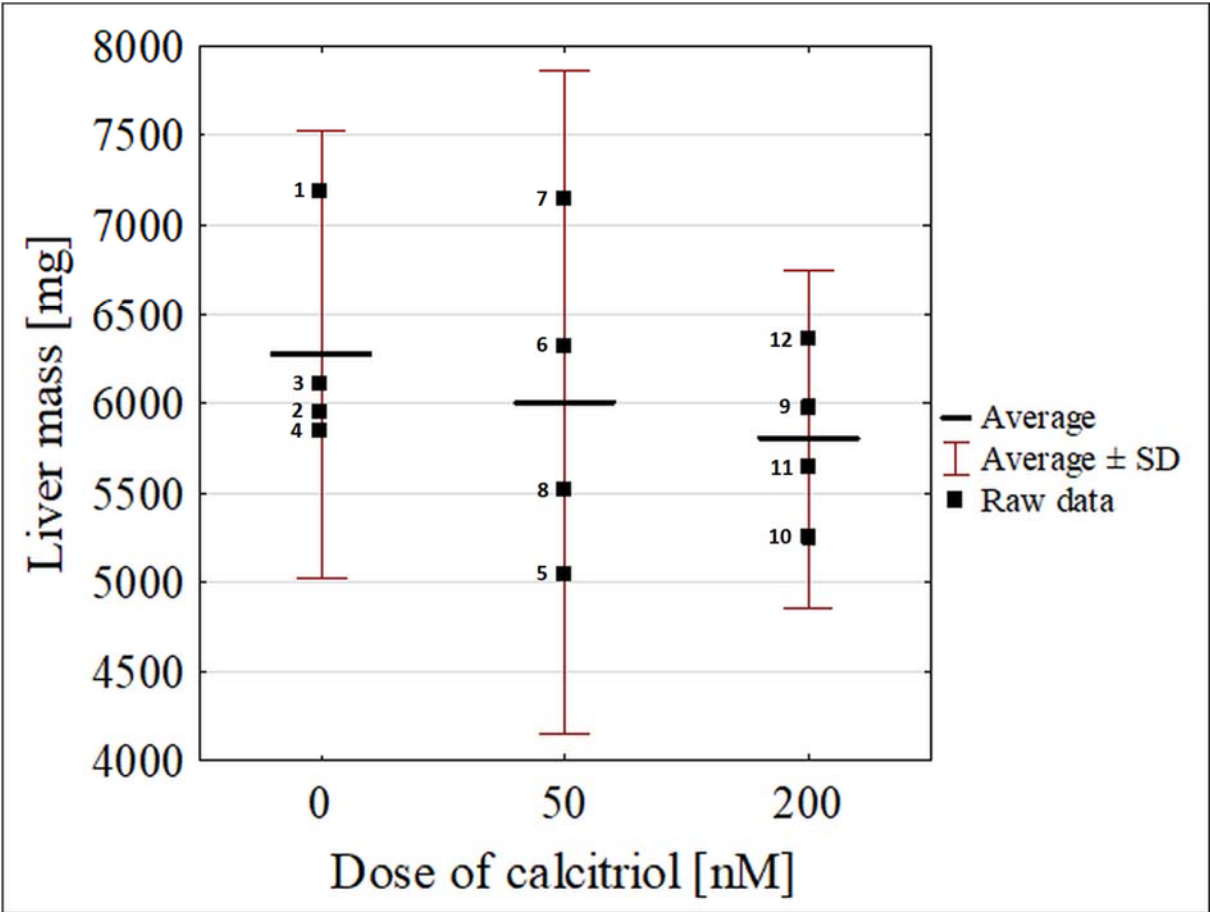

### Figure S3

Mean values for hematological parameters of the blood from hamsters treated with calcitriol. Levels of Mg, P and Ca (Table S1), leukocyte parameters (Table S2) and red blood cell parameters (Table S3).

| Dose of calcitriol | Parameters  |              |              |
|--------------------|-------------|--------------|--------------|
|                    | Mg (mg/dl)  | P (mg/dl)    | Ca (mg/dl)   |
|                    | Mean ± SD   | Mean ± SD    | Mean ± SD    |
| <b>0 nM</b>        | 4,38 ± 0,31 | 9,60 ± 1,44  | 13,97 ± 0,97 |
| <b>50 nM</b>       | 4,57 ± 0,13 | 10,55 ± 0,98 | 13,80 ± 0,85 |
| <b>200 nM</b>      | 4,72 ± 0,21 | 8,71 ± 1,25  | 14,53 ± 1,23 |

Table 1.

| Dose of calcitriol | Parameters                 |                 |                 |                 |               |
|--------------------|----------------------------|-----------------|-----------------|-----------------|---------------|
|                    | WBC (x10 <sup>3</sup> /ul) | Neutrophils (%) | Lymphocytes (%) | Eosinophils (%) | Monocytes (%) |
|                    | Mean ± SD                  | Mean ± SD       | Mean ± SD       | Mean ± SD       | Mean ± SD     |
| <b>0 nM</b>        | 3,53 ± 1,38                | 27,50 ± 5,07    | 70,25 ± 4,92    | 2,25 ± 0,50     | 0,00 ± 0,00   |
| <b>50 nM</b>       | 1,90 ± 0,22                | 25,75 ± 2,89    | 73,25 ± 2,62    | 1,08 ± 0,91     | 0,00 ± 0,00   |
| <b>200 nM</b>      | 3,35 ± 2,47                | 9,94 ± 1,04     | 88,72 ± 1,16    | 1,33 ± 0,58     | 0,00 ± 0,00   |

Table 2.

| Dose of calcitriol | Parameters                 |              |              |              |              |              |
|--------------------|----------------------------|--------------|--------------|--------------|--------------|--------------|
|                    | RBC (x10 <sup>6</sup> /ul) | PCV (%)      | Hb (g/dl)    | MCV (fl)     | MCH (pg)     | MCHC (%)     |
|                    | Mean ± SD                  | Mean ± SD    | Mean ± SD    | Mean ± SD    | Mean ± SD    | Mean ± SD    |
| <b>0 nM</b>        | 6,16 ± 0,10                | 36,15 ± 0,76 | 12,83 ± 0,17 | 58,65 ± 0,64 | 20,83 ± 0,17 | 35,48 ± 0,65 |
| <b>50 nM</b>       | 6,57 ± 0,34                | 38,45 ± 1,87 | 13,28 ± 0,62 | 58,58 ± 0,72 | 20,23 ± 0,45 | 34,53 ± 0,43 |
| <b>200 nM</b>      | 6,70 ± 0,28                | 38,60 ± 0,99 | 13,70 ± 0,28 | 57,65 ± 0,92 | 20,45 ± 0,49 | 35,50 ± 0,14 |

Table 3.

**Figure S4**

Scatter plot of ALT vs AST for a calcitriol dose of 200 nM. ALT = 26.8489+0.1653x. AST:  
ALT r= 0.9845; p= 0.0155; r<sup>2</sup>= 0.9692

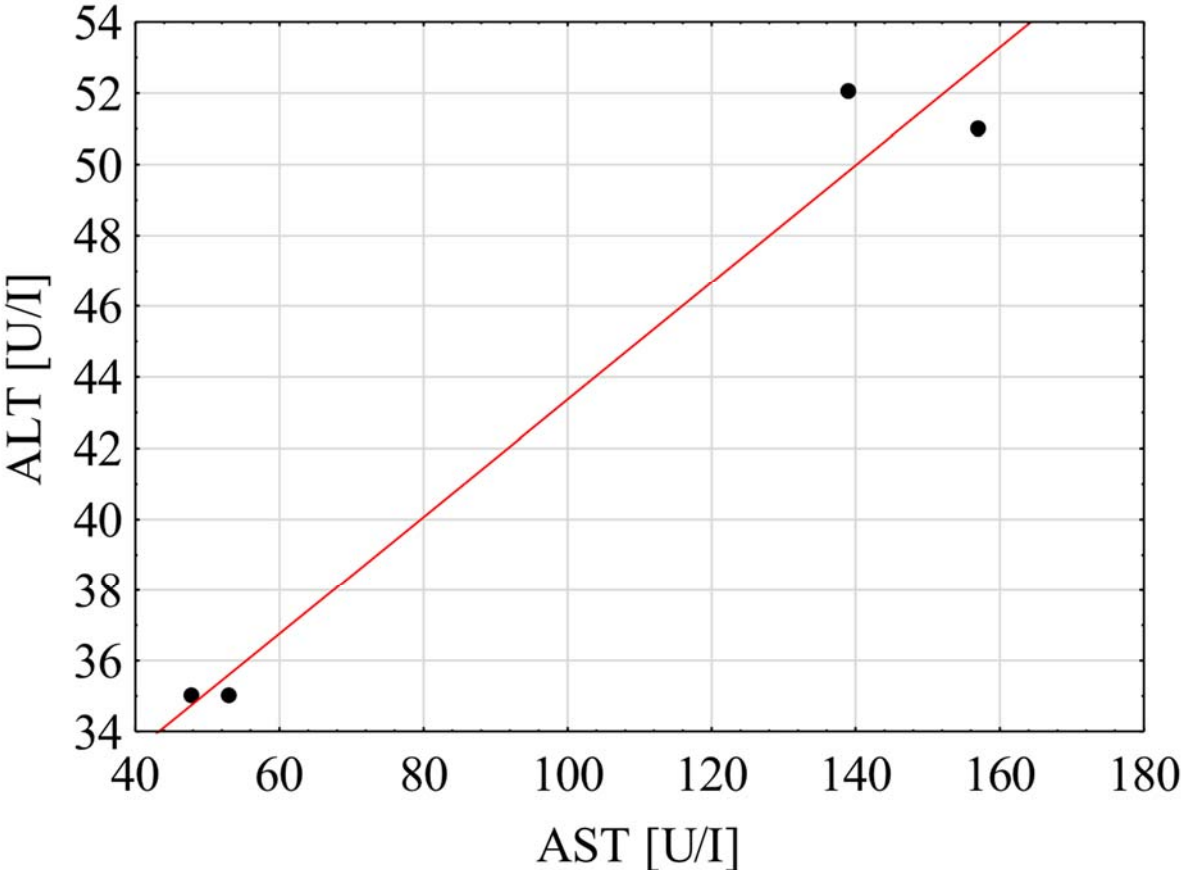

Supplement: NIHMS991839-supplement-1.pdf [file NIHMS991839-supplement-1.pdf]
